# Supplementary material for: Comprehensive genomic analysis of a plant growth-promoting rhizobacterium Pantoea agglomerans strain P5
Source: PubMed Central journal article supplement (PMC5688152; doi:10.1038/s41598-017-15820-9), 2017-11-15
Supplement: 41598_2017_15820_MOESM1_ESM.pdf [file 41598_2017_15820_MOESM1_ESM.pdf]

***Scientific Reports Supporting Information***

**Comprehensive genomic analysis of plant growth-promoting rhizobacterium  
*Pantoea agglomerans* strain P5**

Vahid Shariati J.<sup>1,3</sup>, Mohammad Ali Malboobi<sup>1,2</sup>, Zeinab Tabrizi<sup>1,3</sup>, Elahe Tavakol<sup>4</sup>,  
Parviz Owlia<sup>5</sup>, Maryam Safari<sup>6</sup>

1. Plant Molecular Biotechnology Department, National Institute of Genetic Engineering and Biotechnology, Tehran, Iran
2. R&D Department, Green Biotech Inc., Suite 10, 47 Bu-Ali-Sina St. W, Bistoun Ave., Fatemi Sq., Tehran, Iran
3. NIGEB Genome Center, National Institute of Genetic Engineering and Biotechnology, Tehran, Iran
4. Department of Crop Production and Plant Breeding, College of Agriculture Shiraz University, Shiraz, Iran
5. Molecular Microbiology Research Center, Faculty of Medicine, Shahed University, Tehran, Iran
6. Energy and Environmental Biotechnology Department, National Institute of Genetic Engineering and Biotechnology, Tehran, Iran

Corresponding author:

Mohammad Ali Malboobi, Ph.D.  
Email: [malboobi@nigeb.ac.ir](mailto:malboobi@nigeb.ac.ir)

**Table S1** Percentage of reads mapped on the best reference sequenced genome of *P. agglomerans* strain 190

| Sample                         | No. of reads | Total no. of bases | Percentage of reads passed filtering | Average length of reads (bases) | Longest read (bases) | Percentage of mapped read |
|--------------------------------|--------------|--------------------|--------------------------------------|---------------------------------|----------------------|---------------------------|
| <i>P. agglomerans</i> sp. P5 F | 4,959,985    | 415,929,859        | 100.00%                              | 83.9                            | 90                   | 90.70%                    |
| <i>P. agglomerans</i> sp. P5 R | 4,959,937    | 381,126,821        | 100.00%                              | 76.8                            | 90                   | 90.30%                    |
| Total                          | 9,919,922    | 797,056,680        | 100.00%                              | 80.3                            | 90                   | 90.50%                    |

**Table S2** Raw and clean sequences statistics

| Type       | Raw sequence | Clean sequence |
|------------|--------------|----------------|
| Reads (M)  | 10,396       | 9.919          |
| Bases (Mb) | 935,717      | 797.056        |
| mLen       | 90           | 80.3           |
| pLen       | 90           | 90             |
| Q20        | 96.28%       | 98.28%         |
| GC%        | 55.40%       | 55%            |

**Note:** 1. Read (M): Total Number of Reads in million. 2. Bases(Mb): Total Number of Bases in Mb. 3. mLen: Mean Length of Reads. 4. pLen: Peak Length of Reads. 5. Q20: Percent of base number calls with quality value of 20 or higher (Q20+) (%). 6. GC%: The percentage of GC content.

**Table S3** QUAST report.

|                            | P5 Scaffolds | P5 Scaffolds broken |
|----------------------------|--------------|---------------------|
| # contigs (>= 0 bp)        | 150          | 145                 |
| # Contigs (>= 1000 bp)     | 102          | 127                 |
| # Contigs (>= 5000 bp)     | 83           | 104                 |
| # Contigs (>= 10000 bp)    | 69           | 91                  |
| # Contigs (>= 25000 bp)    | 55           | 68                  |
| # Contigs (>= 50000 bp)    | 33           | 34                  |
| Total length (>= 0 bp)     | 5082485      | 5065933             |
| Total length (>= 1000 bp)  | 5063927      | 5056264             |
| Total length (>= 5000 bp)  | 5018370      | 4995683             |
| Total length (>= 10000 bp) | 4927637      | 4906128             |
| Total length (>= 25000 bp) | 4701771      | 4520697             |
| Total length (>= 50000 bp) | 3906692      | 3268103             |
| # Contigs                  | 110          | 145                 |
| Largest contig             | 280881       | 280881              |
| Total length               | 5070221      | 5065933             |
| GC (%)                     | 54.88        | 54.88               |
| N50                        | 112468       | 77519               |
| N75                        | 52905        | 38775               |
| L50                        | 16           | 22                  |
| L75                        | 32           | 47                  |
| # N's per 100 kbp          | 84.93        | 0.36                |

All statistics are based on contigs of size >= 500 bp, unless otherwise noted (e.g., # contigs (>= 0 bp) and total length (>= 0 bp) include all contigs).

**Table S4** Hrp/Hrc Gene Cluster

| Trait                | COG ID  | Gene annotation                                                                                                      | KO/Gene ID | KEGG GENE NAME            | Strain |     |       |     |
|----------------------|---------|----------------------------------------------------------------------------------------------------------------------|------------|---------------------------|--------|-----|-------|-----|
|                      |         |                                                                                                                      |            |                           | P5     | 190 | PG734 | IG1 |
| Hrp/Hrc Gene Cluster | -       | Type III secretion protein W                                                                                         | K04058     | yscW, sctW                |        |     | *     |     |
|                      | -       | Putative HrpW chaperone                                                                                              | -          | -                         |        |     | *     |     |
|                      | -       | Type III effector HopZ3                                                                                              | K08598     | avrA                      |        |     | *     |     |
|                      | -       | Type III secretion inner membrane channel protein (LcrD,HrcV,EscV,SsaV)                                              | K03230     | -                         | *      | *   | *     | *   |
|                      | -       | Type III secretion protein HrpT                                                                                      | -          | HrpT                      |        |     | *     |     |
|                      | COG1766 | Type III secretion bridge between inner and outer membrane lipoprotein                                               | K03222     | (YscJ,HrcJ,EscJ, PscJ)    | *      | *   | *     | *   |
|                      | -       | Type III secretion protein F                                                                                         | K03221     | yscF, sctF                |        |     | *     |     |
|                      | -       | Type III secretion protein G                                                                                         | -          | HrpG                      |        |     | *     |     |
|                      | COG1684 | Type III secretion inner membrane protein (YscT, HrcT, SpaR, EscT, EpaR1, homologous to flagellar export components) | K03228     | YscT,HrcT,SpaR,EscT,EpaR1 | *      | *   | *     | *   |
|                      | -       | Type III secretion protein HrpB(Pto)                                                                                 | -          | YscI/HrpB                 |        |     | *     |     |
|                      | -       | Hrp pili protein hrpA (TTSS pilin hrpA1)                                                                             | -          | hrpA1                     |        |     | *     |     |
|                      | -       | Type III secretion protein HrpJ                                                                                      | K04058     | yscW, sctW                |        |     | *     |     |
|                      | COG1987 | Type III secretion inner membrane protein (YscS,homologous to flagellar export components)                           | K03227     | YscS                      | *      | *   | *     | *   |
|                      | -       | Type III secretion protein HrpQ                                                                                      | K03220.    | yscD, sctD                |        |     | *     |     |
|                      | -       | Type III secretion spans bacterial envelope protein                                                                  | K04056     | yscO, sctO                |        |     | *     |     |
|                      | -       | Type III secretion protein P                                                                                         | -          | HrpP                      |        |     | *     |     |
|                      | COG1377 | Type III secretion inner membrane protein (YscU,SpaS,EscU,HrcU,SsaU, homologous to flagellar export components)      | K03229     | yscU, sctU, hrcU          | *      | *   | *     | *   |
|                      | COG1317 | Type III secretion cytoplasmic protein                                                                               | K03223     | yscL, sctL                |        |     | *     |     |
|                      | -       | Type III secretion protein HrpD                                                                                      | -          | HrpD                      |        |     | *     |     |
|                      | -       | Type III secretion outer membrane pore forming protein (YscC,MxiD,HrcC, InvG)                                        | K03219     | yscC, sctC                | *      | *   | *     | *   |
|                      | COG1886 | Type III secretion protein HrcQb                                                                                     | K03225     | yscQ, sctQ, hrcQ          |        |     | *     |     |
|                      | COG1338 | Type III secretion inner membrane protein (YscR,SpaR,HrcR,EscR,homologous to flagellar export components)            | K03226     | YscR,SpaR,HrcR,EscR       | *      | *   | *     | *   |

\* represent the existence of listed genes in each strains based on core-pan genome data.

Table S5 P5 strain-specific genes

| Trait                              | COG ID   | Gene annotation                                                    | KO/Gene ID | KEGG GENE NAME           | Strains |
|------------------------------------|----------|--------------------------------------------------------------------|------------|--------------------------|---------|
| CRISPR-Cas system                  | COG1203  | CRISPR-associated endonuclease/helicase Cas3                       | K07012     | cas3                     |         |
|                                    | -        | CRISPR system Cascade subunit CasA                                 | K19123     | casA, cse1               |         |
|                                    | -        | CRISPR system Cascade subunit CasB                                 | K19046     | casB, cse2               |         |
|                                    | -        | CRISPR system Cascade subunit CasE                                 | K19126     | casE, cse3               | P5      |
|                                    | -        | CRISPR system Cascade subunit CasC                                 | K19124     | casC, cse4               |         |
|                                    | -        | CRISPR system Cascade subunit CasD                                 | K19125     | casD, cse5               |         |
| ABC transporter                    | COG1137  | Putative ATP-binding component of a transport system               | K06861     | yhbG                     |         |
|                                    | COG1134  | Teichoic acid transport system ATP-binding protein                 | K09693     | tagH                     | P5      |
|                                    | -        | Corrinoid ABC transporter ATPase                                   | -          | btuD                     |         |
| Phosphotransferase system (PTS)    | COG1447  | PTS system, cellobiose -specific IIA component                     | K02759     | PTS-Cel-EIIA, celC, chbA |         |
|                                    | COG1440  | PTS system, cellobiose-specific IIB component                      | K02760     | PTS-Cel-EIIB, celA, chbB | P5      |
|                                    | COG1440  | PTS system, cellobiose-specific IIC component                      | K02761     | PTS-Cel-EIIB, celA, chbB |         |
| Transcription factors              | COG3711  | Transcriptional antiterminator of lichenan operon, BglG family     | K03491     | licR                     | P5      |
|                                    | COG0583  | HTH-type transcriptional regulator                                 | K16135.    | dmlR                     | P5      |
| Transcription regulation           | -        | Transcriptional regulatory protein, C terminal domain              | -          | HMPREF1248_0490          | P5      |
|                                    | -        | Response regulator of zinc sigma-54-dependent two-component system | -          | LTSEMON_5829             | P5      |
| Transferase activity               | -        | Puative glycosyltransferase                                        | -          | YkoT                     |         |
|                                    | COG1835. | O-acetyltransferase                                                | -          | OatA                     |         |
|                                    | COG2225  | Malate synthase A                                                  | K01638     | aceB                     | P5      |
|                                    | -        | Acyltransferase 3                                                  | -          | -                        |         |
| Methyltransferase                  | -        | Type II DNA modification methyltransferase                         | K01854     | -                        |         |
|                                    | -        | 2-O-methyltransferase NoeI                                         | K21402     | noeI                     | P5      |
| Isomerases                         | COG0562  | UDP-galactopyranose mutase;                                        | -          | glf                      |         |
|                                    | COG1047  | FKBP-type peptidyl-prolyl cis-trans isomerase                      | K03775     | slyD                     | P5      |
| -                                  | -        | Propanediol utilization polyhedral body protein                    | -          | pduA                     | P5      |
| -                                  | -        | Ethidium bromide-methyl viologen resistance protein                | -          | EmrE                     | P5      |
| -                                  | -        | Endo-1,4-beta-xylanase A precursor                                 | K13465     | EIX                      | P5      |
| -                                  | -        | Anti-anti-sigma factor RsbV                                        | K04749     | -                        | P5      |
| RNA polymerase-associated proteins | COG1366  | Anti-sigma B factor antagonist                                     | K04749     | rsbV                     | P5      |

|                                            |         |                                                                    |         |                  |    |
|--------------------------------------------|---------|--------------------------------------------------------------------|---------|------------------|----|
| -                                          | -       | Protein Gp49                                                       | -       | -                | P5 |
| -                                          | -       | Peptidyl-Asp metalloendopeptidase;                                 | -       | -                | P5 |
| <b>Endonuclease activity</b>               | -       | Putative type II restriction endonuclease                          | -       | cglIR            | P5 |
| -                                          | -       | LSU ribosomal protein L4p (L1e)                                    | K03010  | -                | P5 |
| <b>Nucleotidyl transferases</b>            | COG3344 | Retron-type RNA-directed DNA polymerase                            | K00986  | -                | P5 |
| <b>Acyl-transferase</b>                    | COG1835 | Putative lipopolysaccharide modification acyltransferase           | -       | Pfl01_2610       | P5 |
| <b>Phosphorelay sensor kinase activity</b> | -       | Sensory box histidine kinase                                       | -       | PP_3545          | P5 |
| <b>Chaperone</b>                           | COG3121 | Chaperone protein                                                  | -       | papD             | P5 |
| <b>Serine-type endopeptidase activity</b>  | COG1404 | Calcium-dependent protease                                         | -       | prcA             | P5 |
| -                                          | COG1474 | Cell division control protein 6                                    | K02213  | CDC6             | P5 |
| <b>Alcohol dehydrogenase activity</b>      | COG1062 | S-(hydroxymethyl)glutathione dehydrogenase / alcohol dehydrogenase | K00121. | frmA, ADH5, adhC | P5 |
| <b>Stress response</b>                     | -       | Stress response protein                                            | -       | YsnF             | P5 |
| -                                          | COG1974 | DNA polymerase V subunit                                           | K03503  | DPO5D, umuD      | P5 |
| <b>DNA binding</b>                         | COG0732 | Type-I restriction enzyme EcoKI specificity protein                | K01154  | hsdS             | P5 |
| -                                          | -       | Anti-RssB factor                                                   | -       | AN688_0223255    | P5 |
| <b>Hydrolases</b>                          | COG0363 | Glucosamine-6-phosphate deaminase                                  | K02564  | nagB, GNPDA      | P5 |
| -                                          | COG3203 | outer membrane pore protein F                                      | K09476  | ompF             | P5 |
| -                                          | COG2723 | 6-phospho-beta-glucosidase                                         | K01223  | bglA             | P5 |
| -                                          | -       | Phosphoglycerate mutase family                                     | K01837  | BPGM             | P5 |
| <b>Hydrolase activity</b>                  | -       | Organophosphate pesticide hydrolase                                | -       | mpd              | P5 |
| <b>Lyases</b>                              | COG0346 | Lactoylglutathione lyase;                                          | K01759  | GLO1, gloA       | P5 |
| -                                          | COG2801 | Putative transposase                                               | K07497  | -                | P5 |
| -                                          | COG0236 | Acyl carrier protein                                               | K02078. | acpP             | P5 |
| -                                          | COG0287 | Prephenate dehydrogenase                                           | K00210  | -                | P5 |
| <b>Putative transposase</b>                | COG2801 | IS2 transposase TnpB                                               | K07497  | insD1            | P5 |
| <b>Oxidoreductase</b>                      | COG2303 | Gluconate 2-dehydrogenase flavoprotein                             | K06151  | E1.1.99.3A       | P5 |
|                                            |         | EC 1.1.99.3                                                        | K06152  | E1.1.99.3G       |    |
| <b>Nucleic acid binding</b>                | -       | Integrase core domain protein                                      | -       | TTE1156          | P5 |

**Table S6** Gene annotations of *P. agglomerans* strain P5 genome related to its phosphate solubilization ability

|                                         | Trait                         | COG ID             | Gene annotation                                               | KO/Gene ID | KEGG GENE NAME         | EC Number                                 |
|-----------------------------------------|-------------------------------|--------------------|---------------------------------------------------------------|------------|------------------------|-------------------------------------------|
| Pentose phosphate pathway               | <b>Gluconic acid</b>          | COG4993            | quinoprotein glucose dehydrogenase                            | K00117     | gcd                    | EC 1.1.5.2                                |
|                                         |                               | COG1028            | glucose 1-dehydrogenase                                       | K00034     | gdh                    | EC 1.1.1.47                               |
|                                         |                               | COG5424            | pyrroloquinoline-quinone synthase C                           | K06137     | PqqC                   | EC 1.3.3.11                               |
|                                         |                               | COG1025            | coenzyme PQQ synthesis protein F                              | -          | pqqF                   | -                                         |
|                                         |                               | COG1235            | Coenzyme PQQ synthesis protein B                              | K06136     | pqqB                   | -                                         |
|                                         |                               | -                  | Coenzyme PQQ synthesis protein D                              | K06138     | pqqD                   | -                                         |
|                                         |                               | COG0535            | Coenzyme PQQ synthesis protein E                              | K06139     | pqqE                   | -                                         |
|                                         | <b>2-Keto-D-gluconic acid</b> | COG2303            | gluconate 2-dehydrogenase alpha chain                         | K06151     | -                      | EC 1.1.99.3A                              |
|                                         |                               | -                  | gluconate 2-dehydrogenase gamma chain                         | K06152     | -                      | EC 1.1.99.3G                              |
|                                         |                               | COG1052            | - 2-keto-D-gluconate reductase<br>- gluconate 2-dehydrogenase | K00090     | -                      | EC 1.1.1.215                              |
| Glyoxylate and dicarboxylate metabolism | <b>Glycolic acid</b>          | COG0372            | citrate synthase                                              | K01647     | CS, gltA               | EC 2.3.1.1                                |
|                                         |                               | COG0065<br>COG1048 | aconitate hydratase                                           | K01681     | ACO, acnA              | EC 4.2.1.3                                |
|                                         |                               | COG1049            | aconitate hydratase 2                                         | K01682     | gcnB                   | EC 4.2.1.3,<br>EC 4.2.1.99                |
|                                         |                               | COG2224            | isocitrate lyase                                              | K01637     | aceA                   | EC 4.1.3.1                                |
|                                         |                               | COG1052            | Glycerate dehydrogenase                                       | K00018     | HprA                   | EC 1.1.1.29                               |
|                                         |                               | -                  | glyoxylate/hydroxypyruvate reductase                          | K00049     | GRHPR                  | EC 1.1.1.79,<br>EC 1.1.1.81               |
|                                         |                               | COG0111            | glyoxylate/hydroxypyruvate reductase A                        | K12972     | GhrA                   | EC 1.1.1.79,<br>EC 1.1.1.81               |
|                                         |                               | -                  | glyoxylate/succinic semialdehyde reductase                    | K18121     | GLYR                   | EC 1.1.1.79                               |
| Pyruvate metabolism                     | <b>lactic acid</b>            | COG1304            | L-lactate dehydrogenase                                       | K00101     | LldD                   | EC 1.1.2.3                                |
|                                         | <b>Acetic acid</b>            | COG2609            | pyruvate dehydrogenase E1 component                           | K00163     | Ace                    | EC 1.2.4.1                                |
|                                         |                               | COG1071            | pyruvate dehydrogenase E1 component alpha subunit             | K00161     | PDHA, pdhA             | EC 1.2.4.1                                |
|                                         |                               | COG0022            | pyruvate dehydrogenase E1 component beta subunit              | K00162     | PDHB, pdhB             | EC 1.2.4.1                                |
|                                         |                               | COG2609            | pyruvate dehydrogenase E1 component                           | K00163     | AceE                   | EC 1.2.4.1                                |
|                                         |                               | CoG0508            | pyruvate dehydrogenase E2 component                           | K00627     | DLAT, aceF, pdhC       | EC 2.3.1.12                               |
|                                         |                               | COG0365            | acetyl-CoA synthetase                                         | K01895     | ACSS, acs              | EC 6.2.1.1                                |
|                                         |                               | -                  | acetaldehyde dehydrogenase                                    | K00132     |                        | EC 1.2.1.10                               |
|                                         |                               | COG1012            | acetaldehyde dehydrogenase / alcohol dehydrogenase            | K04072     | adhE                   | EC 1.2.1.10                               |
|                                         |                               | COG4569            | acetaldehyde dehydrogenase                                    | K04073     | MhpF                   | EC 1.2.1.10                               |
|                                         |                               | COG4569            | acetaldehyde/propanal dehydrogenase                           | K18366     | bphJ, xylQ, nahO, tesF | EC 1.2.1.10,<br>EC 1.2.1.87               |
|                                         |                               | COG1012            | aldehyde dehydrogenase                                        | K04021     | EutE                   | EC 1.2.1.10                               |
|                                         |                               | COG1012            | aldehyde dehydrogenase                                        | K00128     | ALDH                   | EC 1.2.1.3                                |
|                                         |                               | -                  | aldehyde dehydrogenase family 7 member A1                     | K14085     | ALDH7A1                | EC 1.2.1.31,<br>EC 1.2.1.8,<br>EC 1.2.1.3 |
|                                         |                               | -                  | aldehyde dehydrogenase family 9 member A1                     | K00149     | ALDH9A1                | EC 1.2.1.47<br>EC 1.2.1.3                 |
|                                         |                               | COG1012            | aldehyde dehydrogenase                                        | K00138     | AldB                   | EC 1.2.1.-                                |

## Citrate cycle (TCA cycle)

|                  |                    |                                                                          |        |                  |                           |
|------------------|--------------------|--------------------------------------------------------------------------|--------|------------------|---------------------------|
| <b>Citrate</b>   | COG2609            | pyruvate dehydrogenase E1 component                                      | K00163 | AceE             | EC 1.2.4.1                |
|                  | COG1071            | pyruvate dehydrogenase E1 component<br>alpha subunit                     | K00161 | PDHA, pdhA       | EC 1.2.4.1                |
|                  | COG0022            | pyruvate dehydrogenase E1 component<br>beta subunit                      | K00162 | PDHB, pdhB       | EC 1.2.4.1                |
|                  | COG0508            | pyruvate dehydrogenase E2 component                                      | K00627 | DLAT, aceF, pdhC | EC 2.3.1.12               |
|                  | COG0372            | citrate synthase                                                         | K01647 | CS, gltA         | EC 2.3.3.1                |
| <b>succinate</b> | COG0372            | citrate synthase                                                         | K01647 | CS, gltA         | EC 2.3.3.1                |
|                  | -                  | malate dehydrogenase                                                     | K00025 | MDH1             | EC 1.1.1.37               |
|                  | -                  | malate dehydrogenase                                                     | K00026 | MDH2             | EC 1.1.1.37               |
|                  | COG0039            | malate dehydrogenase                                                     | K00024 | Mdh              | EC 1.1.1.37               |
|                  | COG0579            | malate dehydrogenase (quinone)                                           | K00116 | Mqo              | EC 1.1.5.4                |
|                  | COG1838<br>COG1951 | fumarate hydratase, class I                                              | K01676 | fumA, fumB       | EC 4.2.1.2                |
|                  | COG1951            | fumarate hydratase subunit alphaalsD                                     | K01677 | fumA             | EC 4.2.1.2                |
|                  | COG1838            | fumarate hydratase subunit beta                                          | K01678 | fumB             | E4.2.1.2AB                |
|                  | COG0114            | fumarate hydratase, class II                                             | K01679 | fumC             | E4.2.1.2B                 |
|                  | COG1053            | Succinate dehydrogenase (ubiquinone)<br>flavoprotein subunit             | K00234 | SDHA, SDH1       | EC 1.3.5.1                |
|                  | COG0479            | Succinate dehydrogenase (ubiquinone)<br>iron-sulfur subunit              | K00235 | SDHB, SDH2       | EC 1.3.5.1                |
|                  | COG2009            | Succinate dehydrogenase (ubiquinone)<br>cytochrome b560 subunit          | K00236 | SDHC, SDH3       | -                         |
|                  | COG2142            | Succinate dehydrogenase (ubiquinone)<br>membrane anchor subunit          | K00237 | SDHD, SDH4       | -                         |
|                  | COG1053            | succinate dehydrogenase / fumarate<br>reductase, flavoprotein subunit    | K00239 | sdhA, frdA       | EC 1.3.5.1,<br>EC 1.3.5.4 |
|                  | COG0479            | succinate dehydrogenase / fumarate<br>reductase, iron-sulfur subunit     | K00240 | sdhB, frdB       | EC 1.3.5.1,<br>EC 1.3.5.4 |
|                  | COG2009            | succinate dehydrogenase / fumarate<br>reductase, cytochrome b subunit    | K00241 | sdhC, frdC       | -                         |
|                  | COG2142            | succinate dehydrogenase / fumarate<br>reductase, membrane anchor subunit | K00242 | sdhD, frdD       | -                         |
|                  | -                  | succinate dehydrogenase / fumarate<br>reductase, subunit D               | K18859 | sdhD, frdD       | -                         |
|                  | -                  | putative succinate dehydrogenase /<br>fumarate reductase, subunit D      | K18860 | sdhD, frdD       | -                         |
|                  | COG1053            | fumarate reductase flavoprotein subunit                                  | K00244 | FrdA             | EC 1.3.5.4                |
|                  | COG0479            | fumarate reductase iron-sulfur subunit                                   | K00245 | FrdB             | EC 1.3.5.4                |
|                  | COG3029            | fumarate reductase subunit C                                             | K00246 | FrdC             | -                         |
|                  | COG3080            | fumarate reductase subunit D                                             | K00247 | frdD             | -                         |
|                  | COG1053            | succinate dehydrogenase / fumarate<br>reductase, flavoprotein subunit    | K00239 | sdhA, frdA       | EC 1.3.5.1,<br>EC 1.3.5.4 |
|                  | COG0479            | succinate dehydrogenase / fumarate<br>reductase, iron-sulfur subunit     | K00240 | sdhB, frdB       | EC 1.3.5.1,<br>EC 1.3.5.4 |
|                  | COG2009            | succinate dehydrogenase / fumarate<br>reductase, cytochrome b subunit    | K00241 | sdhC, frdC       | -                         |
|                  | COG2142            | succinate dehydrogenase / fumarate<br>reductase, membrane anchor subunit | K00242 | sdhD, frdD       | -                         |
|                  | -                  | succinate dehydrogenase / fumarate<br>reductase, subunit D               | K18859 | sdhD, frdD       | -                         |
|                  | -                  | putative succinate dehydrogenase /<br>fumarate reductase, subunit D      | K18860 | sdhD, frdD       | -                         |

|                                  |         |                                                                                        |        |      |             |
|----------------------------------|---------|----------------------------------------------------------------------------------------|--------|------|-------------|
| <b>Phosphonate cluster (phn)</b> | COG3624 | Alpha-D-ribose 1-methylphosphonate 5-triphosphate synthase subunit PhnG                | K06166 | PhnG | EC 2.7.8.37 |
|                                  | COG3627 | Alpha-D-ribose 1-methylphosphonate 5-phosphate C-P lyase                               | K06163 | Phnj | EC 4.7.1.1  |
|                                  | COG3625 | Alpha-D-ribose 1-methylphosphonate 5-triphosphate synthase                             | K06165 | PhnH | EC 2.7.8.37 |
|                                  | COG3626 | Alpha-D-ribose 1-methylphosphonate 5-triphosphate synthase subunit PhnI                | K06164 | PhnI | EC 2.7.8.37 |
|                                  | COG0454 | PhnO protein                                                                           | K09994 | PhnO | EC 2.3.1.-  |
|                                  | COG2764 | PhnB protein                                                                           | K04750 | PhnB | -           |
|                                  | COG1524 | phosphonoacetate hydrolase                                                             | K19670 | PhnA | EC 3.11.1.2 |
|                                  | COG3709 | ribose 1,5-bisphosphokinase                                                            | K05774 | PhnN | EC 2.7.4.23 |
|                                  | COG1235 | phosphoribosyl 1,2-cyclic phosphate phosphodiesterase                                  | K06167 | PhnP | EC 3.1.4.55 |
|                                  | COG4107 | putative phosphonate transport system ATP-binding protein                              | K05781 | PhnK | -           |
|                                  | COG4778 | Alpha-D-ribose 1-methylphosphonate 5-triphosphate synthase subunit PhnL                | K05780 | PhnL | EC 2.7.8.37 |
|                                  | COG3639 | phosphonate transport system permease protein                                          | K02042 | phnE | -           |
|                                  | COG2188 | GntR family transcriptional regulator, phosphonate transport system regulatory protein | K02043 | PhnF | -           |



**Table S7** Gene annotations of *P. agglomerans* strain P5 genome related to its phosphate & Phosphonate transportation ability

|                  | Trait                          | COG ID  | Gene annotation                                          | KO/Gene ID | KEGG GENE NAME | EC Number   |
|------------------|--------------------------------|---------|----------------------------------------------------------|------------|----------------|-------------|
| ABC transporters | <b>Phosphonate transporter</b> | COG3639 | phosphonate transport system permease protein            | K02042     | phnE2          | -           |
|                  |                                | COG3221 | phosphate-binding protein of phosphonate ABC transporter | K02044     | phnD           | -           |
|                  |                                | COG3638 | phosphonate transport system ATP-binding protein         | K02041     | PhnC           | EC 3.6.3.28 |
|                  | <b>Phosphate transporter</b>   | COG0226 | phosphate transport system substrate-binding protein     | K02040     | Pst S          | -           |
|                  |                                | COG0581 | phosphate transport system permease protein              | K02038     | Pst A          | -           |
|                  |                                | COG0573 | phosphate transport system permease protein              | K02037     | Pst C          | -           |
|                  |                                | COG1117 | phosphate transport system ATP-binding protein           | K02036     | Pst B          | EC 3.6.3.27 |

**Table S8** Gene annotations of *P. agglomerans* strain P5 genome related to its H<sub>2</sub>S production ability

|                   | Trait                              | COG ID                                           | Gene annotation                                                                 | KO/Gene ID                   | KEGG GENE NAME           | EC Number                                 |               |
|-------------------|------------------------------------|--------------------------------------------------|---------------------------------------------------------------------------------|------------------------------|--------------------------|-------------------------------------------|---------------|
| Sulfur metabolism |                                    | COG2897                                          | thiosulfate/3-mercaptopyruvate sulfurtransferase                                | K01011                       | TST, MPST, sseA          | EC 2.8.1.1                                |               |
|                   |                                    | COG0607                                          | thiosulfate sulfurtransferase                                                   | K02439                       | glpE                     | EC 2.8.1.1                                |               |
|                   |                                    | COG0369                                          | sulfite reductase (NADPH) flavoprotein alpha-component                          | K00380                       | cysJ                     | EC 1.8.1.2                                |               |
|                   |                                    | COG0155                                          | sulfite reductase (NADPH) hemoprotein beta-component                            | K00381                       | cysI                     | EC 1.8.1.2                                |               |
|                   |                                    | -                                                | 3'-phosphoadenosine 5'-phosphosulfate synthase                                  | K13811                       | PAPSS                    | EC 2.7.7.4<br>EC 2.7.1.25                 |               |
|                   |                                    | COG2895<br>COG0529                               | bifunctional enzyme CysN/CysC                                                   | K00955                       | cysNC                    | EC 2.7.7.4<br>EC 2.7.1.25                 |               |
|                   |                                    | COG2895                                          | sulfate adenylyltransferase subunit 1                                           | K00956                       | cysN                     | EC 2.7.7.4                                |               |
|                   |                                    | COG0175                                          | sulfate adenylyltransferase subunit 2                                           | K00957                       | cysD                     | EC 2.7.7.4                                |               |
|                   |                                    | COG0529                                          | adenylylsulfate kinase                                                          | K00860                       | cysC                     | EC 2.7.1.25                               |               |
|                   |                                    | COG0175                                          | phosphoadenosine phosphosulfate reductase                                       | K00390                       | cysH                     | EC 1.8.4.8<br>EC 1.8.4.10                 |               |
|                   |                                    | COG0583                                          | transcriptional regulator CysB                                                  | K13634                       | cysB                     | -                                         |               |
|                   |                                    | COG2141                                          | alkanesulfonate monooxygenase                                                   | K04091                       | ssuD                     | EC 1.14.14.5                              |               |
|                   |                                    | <b>H<sub>2</sub>S production</b>                 | COG0431                                                                         | FMN reductase                | K00299                   | ssuE                                      | EC 1.5.1.38   |
|                   |                                    |                                                  | COG2175                                                                         | taurine dioxygenase          | K03119                   | tauD                                      | EC 1.14.11.17 |
|                   | Cysteine and methionine metabolism |                                                  | COG0626                                                                         | cystathionine gamma-synthase | K01739                   | metB                                      | EC 2.5.1.48   |
|                   |                                    | COG0031                                          | cysteine synthase A                                                             | K01738                       | cysK                     | EC 2.5.1.47                               |               |
|                   |                                    | COG0031                                          | cysteine synthase B                                                             | K12339                       | cysM                     | EC 2.5.1.47                               |               |
|                   |                                    | -                                                | L-3-cyanoalanine synthase/ cysteine synthase                                    | K13034                       | ATCYSC1                  | EC 2.5.1.47                               |               |
|                   |                                    | -                                                | cysteine synthase / O-phosphoserine sulfhydrylase / cystathionine beta-synthase | K10150                       | cysO                     | EC 2.5.1.47<br>EC 2.5.1.65<br>EC 4.2.1.22 |               |
|                   |                                    | COG2873                                          | O-acetylhomoserine/O-acetylserine sulfhydrylase                                 | K17069                       | MET17                    | EC 2.5.1.49<br>EC 2.5.1.47                |               |
|                   |                                    | -                                                | aspartate aminotransferase, cytoplasmic                                         | K14454                       | GOT1                     | EC 2.6.1.1                                |               |
|                   |                                    | COG0436                                          | aspartate aminotransferase                                                      | K00812                       | aspB                     | EC 2.6.1.1                                |               |
|                   |                                    | COG1448                                          | aspartate aminotransferase                                                      | K00813                       | aspC                     | EC 2.6.1.1                                |               |
|                   |                                    | COG0436                                          | aspartate aminotransferase                                                      | K11358                       | yhdR                     | EC 2.6.1.1                                |               |
|                   | COG2897                            | thiosulfate/3-mercaptopyruvate sulfurtransferase | K01011                                                                          | TST, MPST, sseA              | EC 2.8.1.1<br>EC 2.8.1.2 |                                           |               |

**Table S9** Gene annotations of *P. agglomerans* strain P5 genome related to its H<sub>2</sub>S production ability

|                  | Trait                      | COG ID  | Gene annotation                                      | KO/Gene ID | KEGG GENE NAME | EC Number   |
|------------------|----------------------------|---------|------------------------------------------------------|------------|----------------|-------------|
| ABC transporters | Sulfate transport system   | COG1613 | sulfate transport system substrate-binding protein   | K02048     | cysP, sbp      | -           |
|                  |                            | COG0555 | sulfate transport system permease protein            | K02046     | cysU           | -           |
|                  |                            | COG0555 | sulfate transport system permease protein            | K02047     | cysW           | -           |
|                  |                            | COG1118 | sulfate transport system ATP-binding protein         | K02045     | cysA           | EC 3.6.3.25 |
|                  | Cystine transport system   | COG0765 | cystine transport system permease protein            | -          | ABC.CYST.P     | -           |
|                  |                            | COG0834 | cystine transport system substrate-binding protein   | K02424     | fliY           | -           |
|                  |                            | COG1126 | cystine transport system ATP-binding protein         | K10010     | ABC.CYST.A     | EC 3.6.3.-  |
|                  | Taurine transport system   | COG4521 | taurine transport system substrate-binding protein   | K15551     | tauA           | -           |
|                  |                            | COG0600 | taurine transport system permease protein            | K15552     | tauC           | -           |
|                  |                            | COG4525 | taurine transport system ATP-binding protein         | K10831     | tauB           | EC 3.6.3.36 |
|                  | Sulfonate transport system | COG0715 | sulfonate transport system substrate-binding protein | K15553     | ssuA           | -           |
|                  |                            | COG0600 | sulfonate transport system permease protein          | K15554     | ssuC           | -           |
|                  |                            | COG1116 | sulfonate transport system ATP-binding protein       | K15555     | ssuB           | EC:3.6.3.-  |

**Table S10** Gene annotations of *P. agglomerans* strain P5 genome related to its secretion system

| Bacterial secretion system | COG ID  | Gene annotation                              | KO/Gene ID | KEGG GENE NAME          | EC Number   |
|----------------------------|---------|----------------------------------------------|------------|-------------------------|-------------|
| Type I                     | COG1538 | Outer membrane protein                       | K12340     | tolC                    | -           |
| Type III                   | -       | type III secretion protein C                 | K03219     | yscC, sctC              | -           |
|                            | -       | type III secretion protein W                 | K04058     | yscW, sctW              | -           |
|                            | COG1766 | type III secretion protein J                 | K03222     | yscJ, sctJ, hrcJ        | -           |
|                            | COG1338 | type III secretion protein R                 | K03226     | yscR, sctR, hrcR        | -           |
|                            | COG1987 | type III secretion protein S                 | K03227     | yscS, sctS, hrcS        | -           |
|                            | COG1684 | type III secretion protein T                 | K03228     | yscT, sctT, hrcT        | -           |
|                            | COG1377 | type III secretion protein U                 | K03229     | yscU, sctU, hrcU        | -           |
|                            | COG1298 | type III secretion protein V                 | K03230     | yscV, sctV, hrcV        | -           |
|                            | COG1157 | ATP synthase in type III secretion protein N | K03224     | yscN, sctN, hrcN        | EC 3.6.3.14 |
|                            | COG1886 | type III secretion protein Q                 | K03225     | yscQ, sctQ, hrcQ        | -           |
|                            | COG1317 | type III secretion protein L                 | K03223     | yscL, sctL              | -           |
| Type sec-SRP               | COG0342 | preprotein translocase subunit SecD          | K03072     | secD                    | -           |
|                            | COG0690 | preprotein translocase subunit SecE          | K03073     | secE                    | -           |
|                            | COG1314 | preprotein translocase subunit SecG          | K03075     | secG                    | -           |
|                            | COG0201 | preprotein translocase subunit SecY          | K03076     | secY                    | -           |
|                            | COG1862 | preprotein translocase subunit YajC          | K03210     | yajC                    | -           |
|                            | COG0706 | YidC/Oxa1 family membrane protein insertase  | K03217     | yidC,spoIIIJ,OXA1, ccfA | -           |

|                               |         |                                                  |        |                        |            |
|-------------------------------|---------|--------------------------------------------------|--------|------------------------|------------|
|                               | COG0653 | preprotein translocase subunit SecA              | K03070 | secA                   | -          |
|                               | -       | secretion monitor                                | K13301 | secM                   | -          |
|                               | COG0552 | fused signal recognition particle receptor       | K03110 | ftsY                   | -          |
|                               | COG1952 | preprotein translocase subunit SecB              | K03071 | secB                   | -          |
|                               | COG0541 | signal recognition particle subunit SRP54        | K03106 | SRP54, ffh             | EC 3.6.5.4 |
| Twin arginine targeting (Tat) | COG1826 | sec-independent protein translocase protein TatA | K03116 | tatA                   | -          |
|                               | COG1826 | sec-independent protein translocase protein TatB | K03117 | tatB                   | -          |
|                               | COG0805 | sec-independent protein translocase protein TatC | K03118 | tatC                   | -          |
|                               | COG1826 | sec-independent protein translocase protein TatE | K03425 | tatE                   | -          |
| Type VI                       | COG3501 | type VI secretion system secreted protein VgrG   | K11904 | vgrG                   | -          |
|                               | COG3157 | type VI secretion system secreted protein Hcp    | K11903 | Hcp                    | -          |
|                               | COG3521 | type VI secretion system protein VasD            | K11906 | vasD, lip              | -          |
|                               | COG3523 | type VI secretion system protein ImpL            | K11891 | impL, vasK, icmF       | -          |
|                               | COG0542 | type VI secretion system protein VasG            | K11907 | vasG, clpV             | -          |
|                               | COG3455 | type VI secretion system protein ImpK            | K11892 | impK, ompA, vasF, dotU | -          |

**Table S11** Gene annotations of *P. agglomerans* strain P5 genome related to its of phytohormones biogenesis ability.

|                       | Trait                          | COG ID         | Gene annotation                                                                      | KO/Gen e ID                                                                          | KEGG GENE NAME   | EC Number                                 |                                           |
|-----------------------|--------------------------------|----------------|--------------------------------------------------------------------------------------|--------------------------------------------------------------------------------------|------------------|-------------------------------------------|-------------------------------------------|
| Tryptophan metabolism | IAA production                 | COG0154        | Amidase                                                                              | K01426                                                                               | amiE             | EC 3.5.1.4                                |                                           |
|                       |                                | COG0076        | aromatic-L-amino-acid decarboxylase                                                  | K01593                                                                               | DDC              | EC 4.1.1.28                               |                                           |
|                       |                                | COG1012        | aldehyde dehydrogenase (NAD <sup>+</sup> )                                           | K00128                                                                               | ALDH             | EC 1.2.1.3                                |                                           |
|                       |                                | -              | aldehyde dehydrogenase family 7 member A1                                            | K14085                                                                               | ALDH7A1          | EC 1.2.1.31<br>EC 1.2.1.8<br>EC 1.2.1.3   |                                           |
|                       |                                | -              | aldehyde dehydrogenase family 9 member A1                                            | K00149                                                                               | ALDH9A1          | EC 1.2.1.47,<br>EC 1.2.1.3                |                                           |
| Butanoate pathway     | 3-hydroxy-2-butanone (acetoin) | COG0028        | acetolactate synthase I/II/III large subunit                                         | K01652                                                                               | ilvB, ilvG, ilvI | EC 2.2.1.6                                |                                           |
|                       |                                | COG0440        | acetolactate synthase I/III small subunit                                            | K01653                                                                               | ilvH, ilvN       | EC 2.2.1.6                                |                                           |
|                       |                                | COG3978        | acetolactate synthase II small subunit                                               | K11258                                                                               | IlvM             | EC 2.2.1.6                                |                                           |
|                       |                                | COG3527        | acetolactate decarboxylase                                                           | K01575                                                                               | alsD, budA, aldC | EC 4.1.1.5                                |                                           |
|                       |                                | COG1028        | meso-butanediol dehydrogenase / (S, S)-butanediol dehydrogenase / diacetyl reductase | K03366                                                                               | butA, budC       | EC 1.1.1.-<br>EC 1.1.1.76<br>EC 1.1.1.304 |                                           |
|                       |                                | COG1028        | meso-butanediol dehydrogenase / (S, S)-butanediol dehydrogenase / diacetyl reductase | K18009                                                                               | budC             | EC 1.1.1.-<br>EC 1.1.1.76<br>EC 1.1.1.304 |                                           |
|                       |                                | COG1028        | meso-butanediol dehydrogenase / (S, S)-butanediol dehydrogenase / diacetyl reductase | K03366                                                                               | butA, budC       | EC 1.1.1.-<br>EC 1.1.1.76<br>EC 1.1.1.304 |                                           |
|                       |                                | COG1028        | meso-butanediol dehydrogenase / (S, S)-butanediol dehydrogenase / diacetyl reductase | K18009                                                                               | budC             | EC 1.1.1.-<br>EC 1.1.1.76<br>EC 1.1.1.304 |                                           |
|                       |                                | 2,3-butanediol | COG1063                                                                              | (R, R)-butanediol dehydrogenase / meso-butanediol dehydrogenase / diacetyl reductase | K00004           | BDH, butB                                 | EC 1.1.1.4<br>EC 1.1.1.-<br>EC 1.1.1.303  |
|                       |                                |                | COG1028                                                                              | meso-butanediol dehydrogenase / (S, S)-butanediol dehydrogenase / diacetyl reductase | K03366           | butA, budC                                | EC 1.1.1.-<br>EC 1.1.1.76<br>EC 1.1.1.304 |

|                                     |                    |                                                                                |        |                  |                                           |
|-------------------------------------|--------------------|--------------------------------------------------------------------------------|--------|------------------|-------------------------------------------|
|                                     | COG0028            | acetolactate synthase catalytic subunit                                        | K01652 | ilvB, ilvG, ilvI | EC 2.2.1.6L                               |
|                                     | COG3978            | acetolactate synthase II small subunit                                         | K11258 | ilvM             | EC 2.2.1.6                                |
|                                     | COG0440            | acetolactate synthase I/III small subunit                                      | K01653 | ilvH, ilvN       | EC 2.2.1.6S                               |
|                                     | COG0028            | acetolactate synthase I/II/III large subunit                                   | K01652 | ilvB, ilvG, ilvI | EC 2.2.1.6L                               |
|                                     | COG0028            | acetolactate synthase large subunit                                            | K01576 | MdIC             | EC 2.2.1.6                                |
|                                     | COG3527            | alpha-acetolactate decarboxylase                                               | K01575 | alsD             | EC 4.1.1.5                                |
| <b>GABA</b>                         | COG1012            | succinate-semialdehyde dehydrogenase/glutarate-semialdehyde dehydrogenase      | K00135 | gabD             | EC 1.2.1.16<br>EC 1.2.1.79<br>EC 1.2.1.20 |
|                                     | COG1012            | succinate-semialdehyde dehydrogenase                                           | K08324 | Sad              | EC 1.2.1.16<br>EC 1.2.1.24                |
|                                     |                    | succinate-semialdehyde dehydrogenase                                           | K00139 | ALDH5A1          | EC 1.2.1.24                               |
|                                     |                    | succinate-semialdehyde dehydrogenase, mitochondrial                            | K17761 | SSADH            | EC 1.2.1.24                               |
|                                     | COG0160            | 4-aminobutyrate aminotransferase / (S)-3-amino-2-methylpropionate transaminase | K13524 | ABAT             | EC 2.6.1.19<br>EC 2.6.1.22                |
|                                     | COG0160<br>COG4992 | 4-aminobutyrate aminotransferase / (S)-3-amino-2-methylpropionate transaminase | K07250 | gabT             | EC 2.6.1.19<br>EC 2.6.1.22                |
|                                     | COG0160<br>COG4992 | 5-aminovalerate/4-aminobutyrate aminotransferase]                              | K14268 | davT, gabT       | EC:2.6.1.48<br>EC 2.6.1.19                |
|                                     | COG0160<br>COG4992 | 4-aminobutyrate aminotransferase                                               | K00823 | puuE             | EC 2.6.1.19                               |
| <b>4-hydroxybenzoate Production</b> | COG3161            | chorismate-pyruvate lyase                                                      | -      | ubiC             | EC 4.1.3.40                               |

**Table S12** Gene annotations of *P. agglomerans* strain P5 genome related to its siderophore biogenesis ability

|                                                         | Trait              | COG ID             | Gene annotation                                         | KO/Gene ID | KEGG GENE NAME         | EC Number                   |
|---------------------------------------------------------|--------------------|--------------------|---------------------------------------------------------|------------|------------------------|-----------------------------|
| Biosynthesis of siderophore group nonribosomal peptides | <b>Siderophore</b> | COG1535<br>COG3433 | bifunctional isochorismate lyase / aryl carrier protein | K01252     | entB, dhbB, vibB, mxcF | EC 3.3.2.1,<br>EC 6.3.2.14  |
|                                                         |                    | COG1021            | 2,3-dihydroxybenzoate-AMP ligase                        | K02363     | entE, dhbE, vibE, mxcE | EC 6.3.2.14,<br>EC 2.7.7.58 |
|                                                         |                    | COG1020<br>COG3319 | enterobactin synthetase component F                     | K02364     | entF                   | EC 6.3.2.14                 |
|                                                         |                    | COG0477            | Enterobactin exporter                                   | K08225     | EntS                   | -                           |
|                                                         |                    | COG1028            | 2,3-dihydro-2,3-dihydroxybenzoate dehydrogenase         | K00216     | entA                   | EC 1.3.1.28                 |
|                                                         |                    | COG1169            | salicylate biosynthesis isochorismate synthase          | K01851     | pchA                   | EC 5.4.4.2                  |
|                                                         |                    | COG1169            | isochorismate synthase                                  | K02361     | entC                   | EC 5.4.4.2                  |
|                                                         |                    | COG1169            | menaquinone-specific isochorismate synthase             | K02552     | menF                   | EC 5.4.4.2                  |
|                                                         |                    | COG0147            | salicylate synthetase                                   | K04781     | mbtI, irp9, ybtS       | EC 5.4.4.2,<br>EC 4.2.99.21 |
|                                                         |                    | COG0614            | Ferric enterobactin-binding periplasmic protein         | K02016     | FepB                   | -                           |

|         |                                                                                            |        |       |   |
|---------|--------------------------------------------------------------------------------------------|--------|-------|---|
| COG0609 | Ferric enterobactin transport system permease protein                                      | K02015 | FepD  | - |
| -       | Ferric enterobactin transport system permease protein                                      | -      | FepG  | - |
|         | Ferric enterobactin transport ATP-binding protein                                          | -      | FepC  | - |
| COG2382 | Enterobactin esterase                                                                      | K07214 | Fes   | - |
| -       | TonB-dependent receptor; Outer membrane receptor for ferric enterobactin and colicins B, D | K19611 | GAPWK | - |
| -       | Putative OMR family iron-siderophore receptor precursor"                                   | -      | -     | - |
